# Supplementary material for: Regulation of flavonoids in strawberry fruits by FaMYB5/FaMYB10 dominated MYB-bHLH-WD40 ternary complexes
Source: Front Plant Sci. 2023 Mar 13;14:1145670. doi: 10.3389/fpls.2023.1145670 (PMC10040760; doi:10.3389/fpls.2023.1145670)
Supplement: Supplementary file 1 [file DataSheet_1.docx]

**Regulation of strawberry fruit flavonoids by multiple MYB-bHLH-WD40 ternary complexes**

**Maolan Yue 1†, Leiyu Jiang 1†, Nating Zhang 1, Lianxi Zhang 1, Yongqiang Liu1, Yuanxiu Lin1,2, Yunting Zhang1,2, Ya Luo1, Yong Zhang1, Yan Wang1,2, Mengyao Li1, Xiaorong Wang1,2, Qing Chen1*, Haoru Tang1,2***

1Country College of Horticulture, Sichuan Agricultural University, Chengdu, China

2 Institute of Pomology & Olericulture, Sichuan Agricultural University, Chengdu, China

*** Correspondence:**Qing Chen, supnovel@sicau.edu.cn
Haoru Tang, htang@sicau.edu.cn

**Supplementary Figures list**

**Figure S1** The phenotype of transient overexpression MYBs in ‘Benihoppe’ fruits.

**Figure S2** Analysis of Cy3G and Pg3G by HPLC method.

**Figure S3** Relative expression levels of genes in their own overexpressed samples.

**Figure S4** R3-FaMYB5 and R2R3-FaMYB5 dimerized in different cell regions.

**Figure S5** Relative expression levels of *FaLWD1* and *FaLWD1-like* in *FaMYB5* OE.

**Figure S6** FaLWD1 and FaLWD1-like dimerized in different cell regions.

**Figure S7** The phenotype of transient overexpression FaMYB1, FaEGL3 and FaLWD1-like in ‘Benihoppe’ fruits.


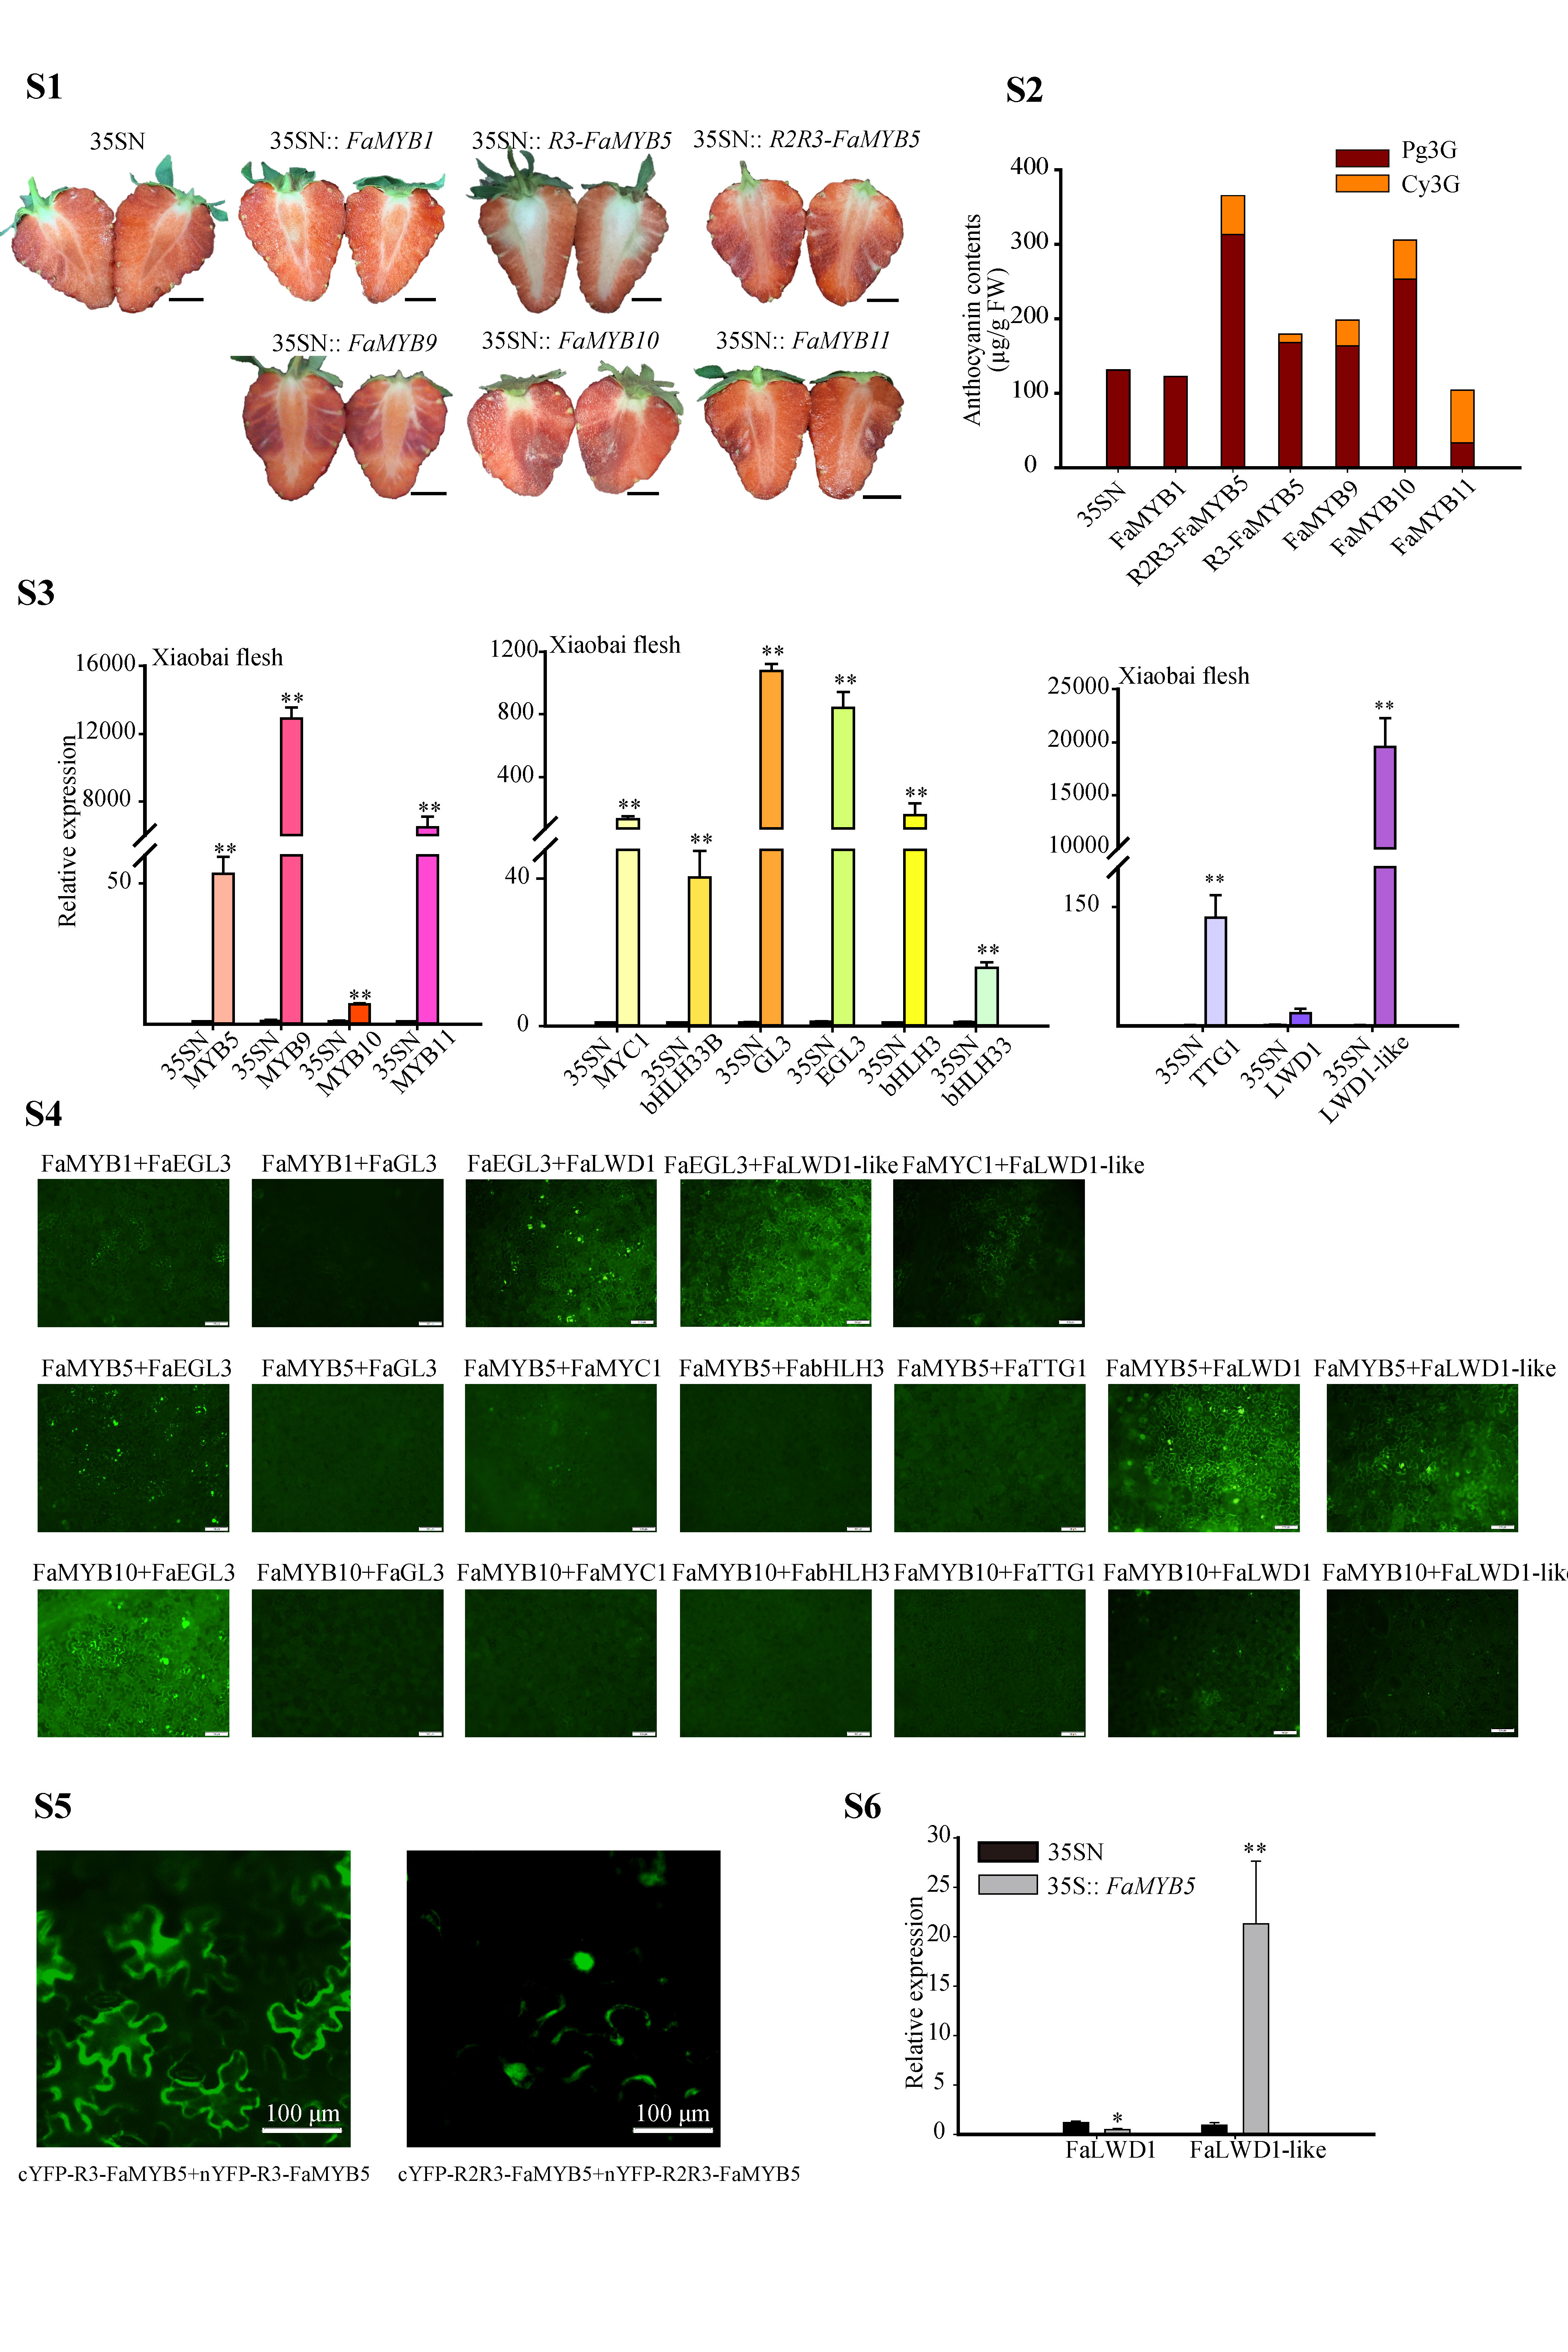


**Figure S1** The phenotype of transient overexpression MYBs in ‘Benihoppe’ fruits.


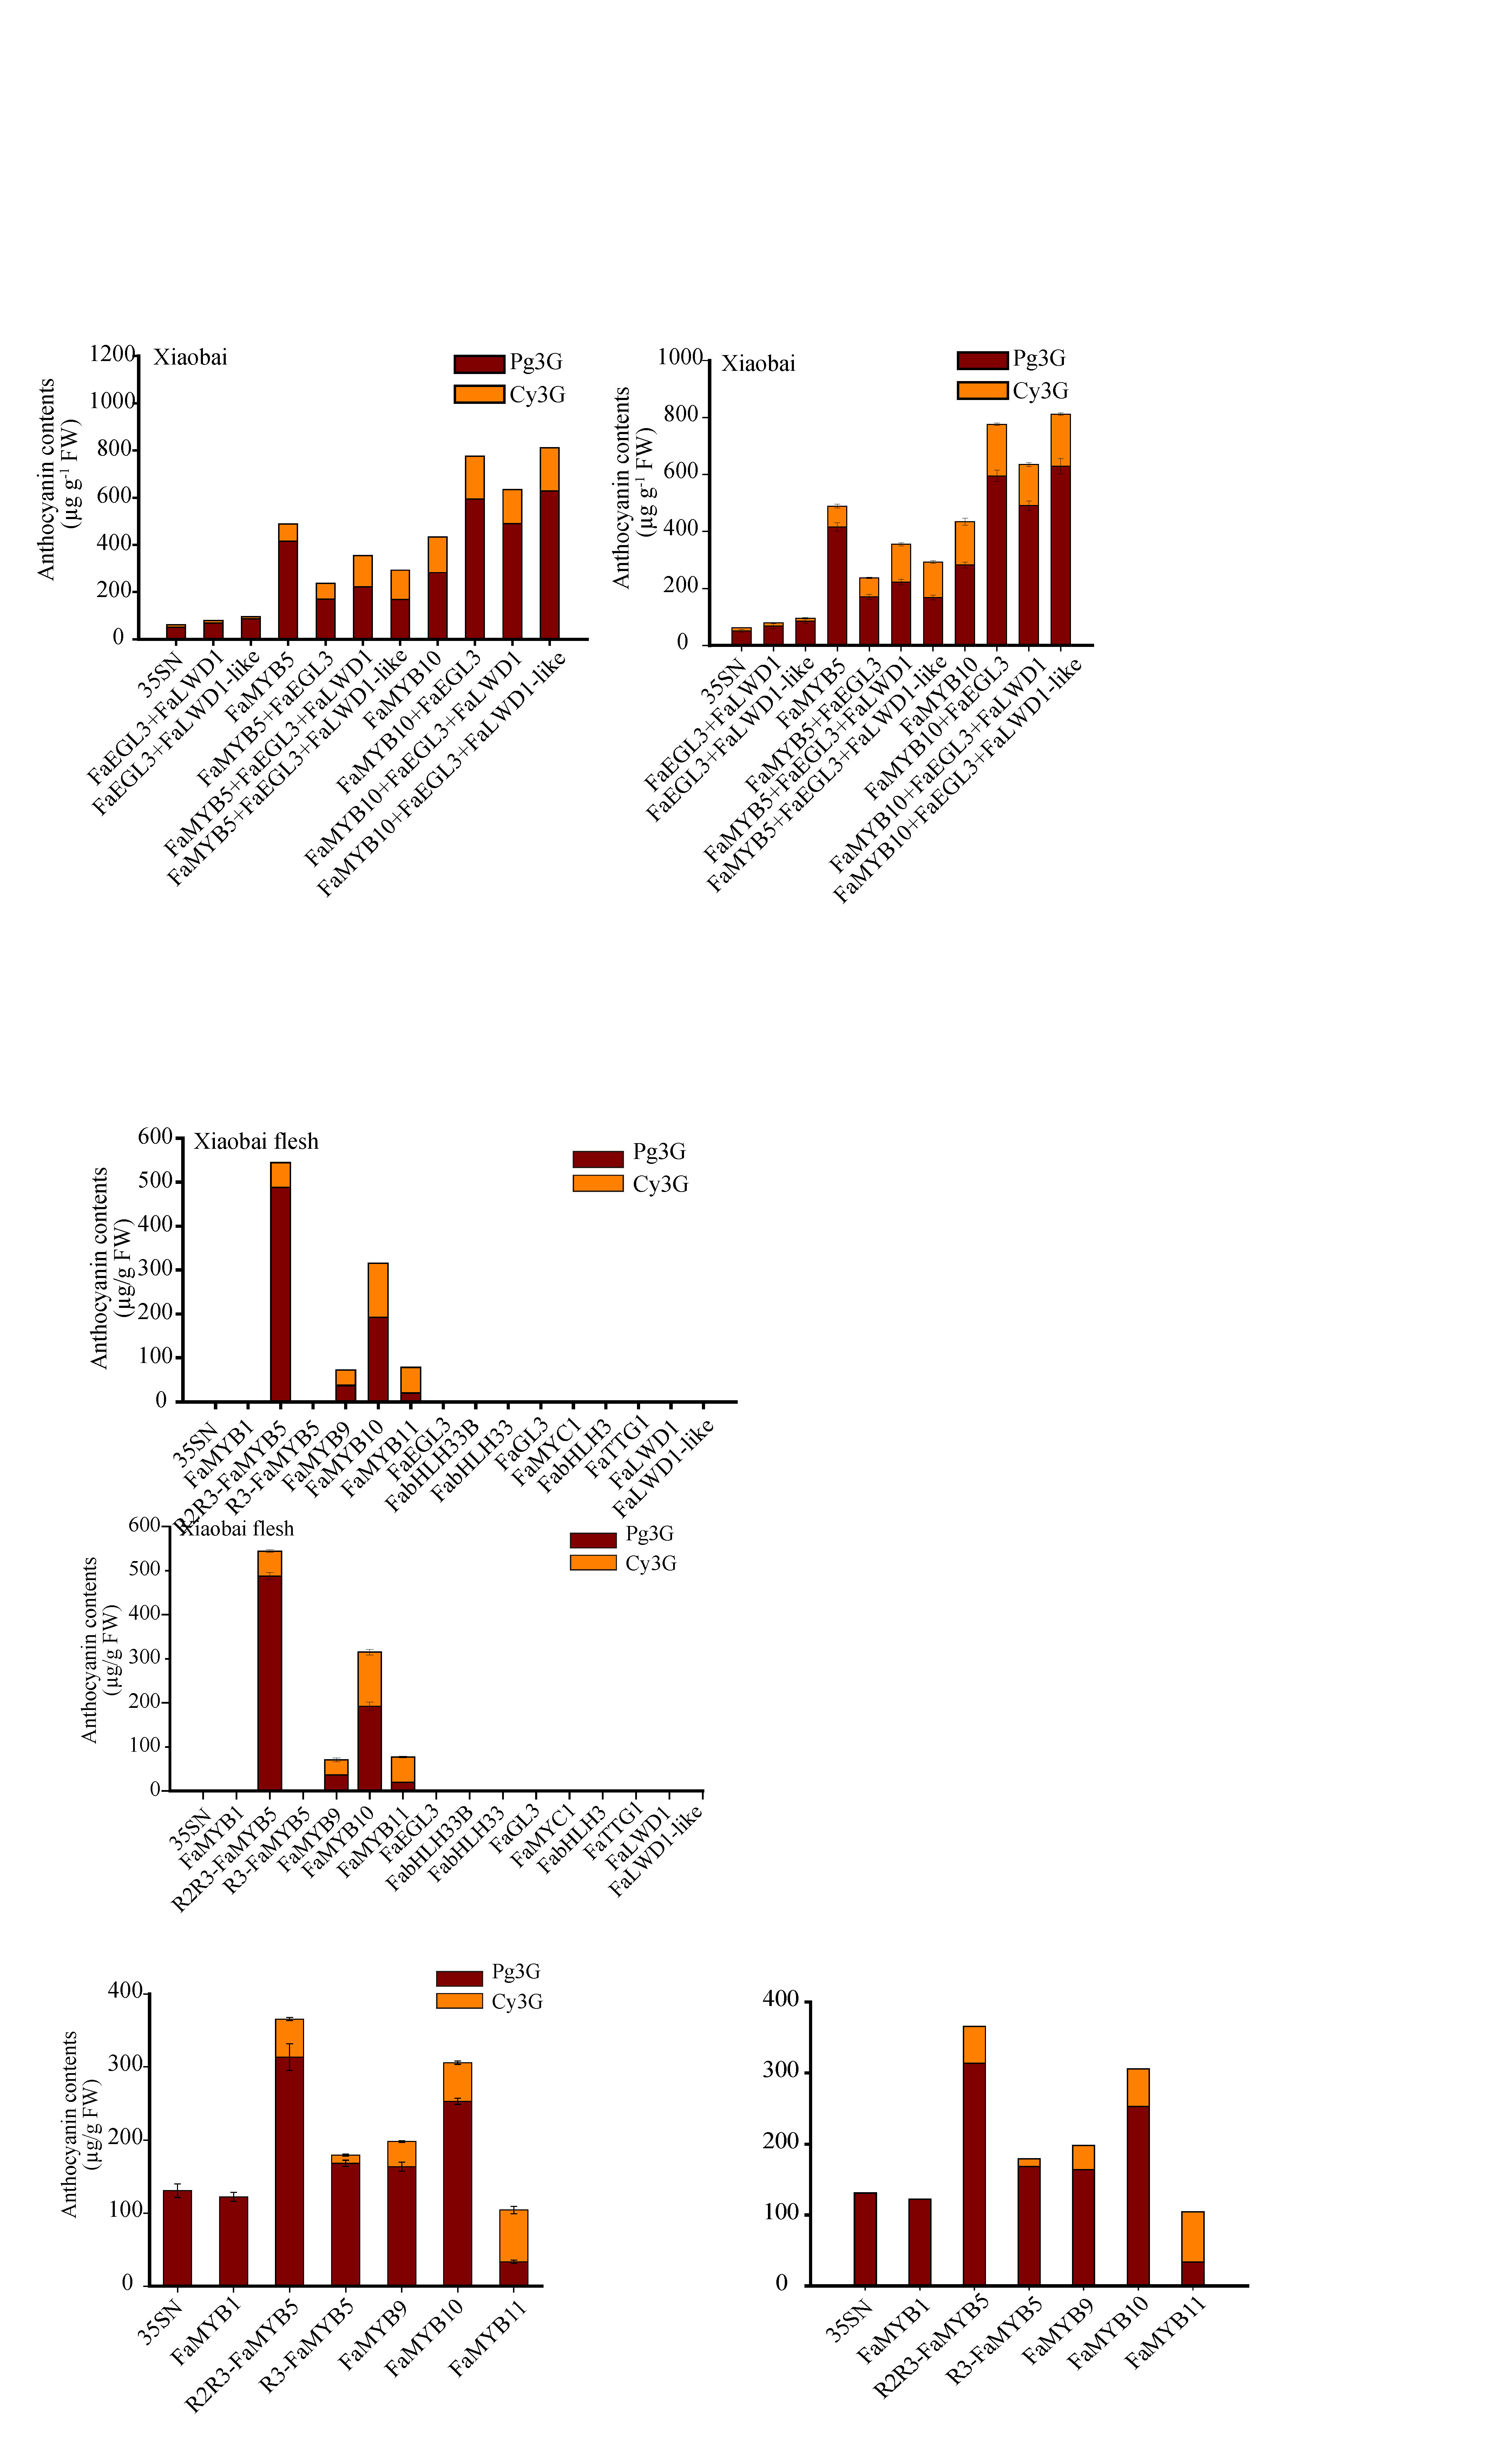


**Figure S2** Analysis of Cy3G and Pg3G by HPLC method.


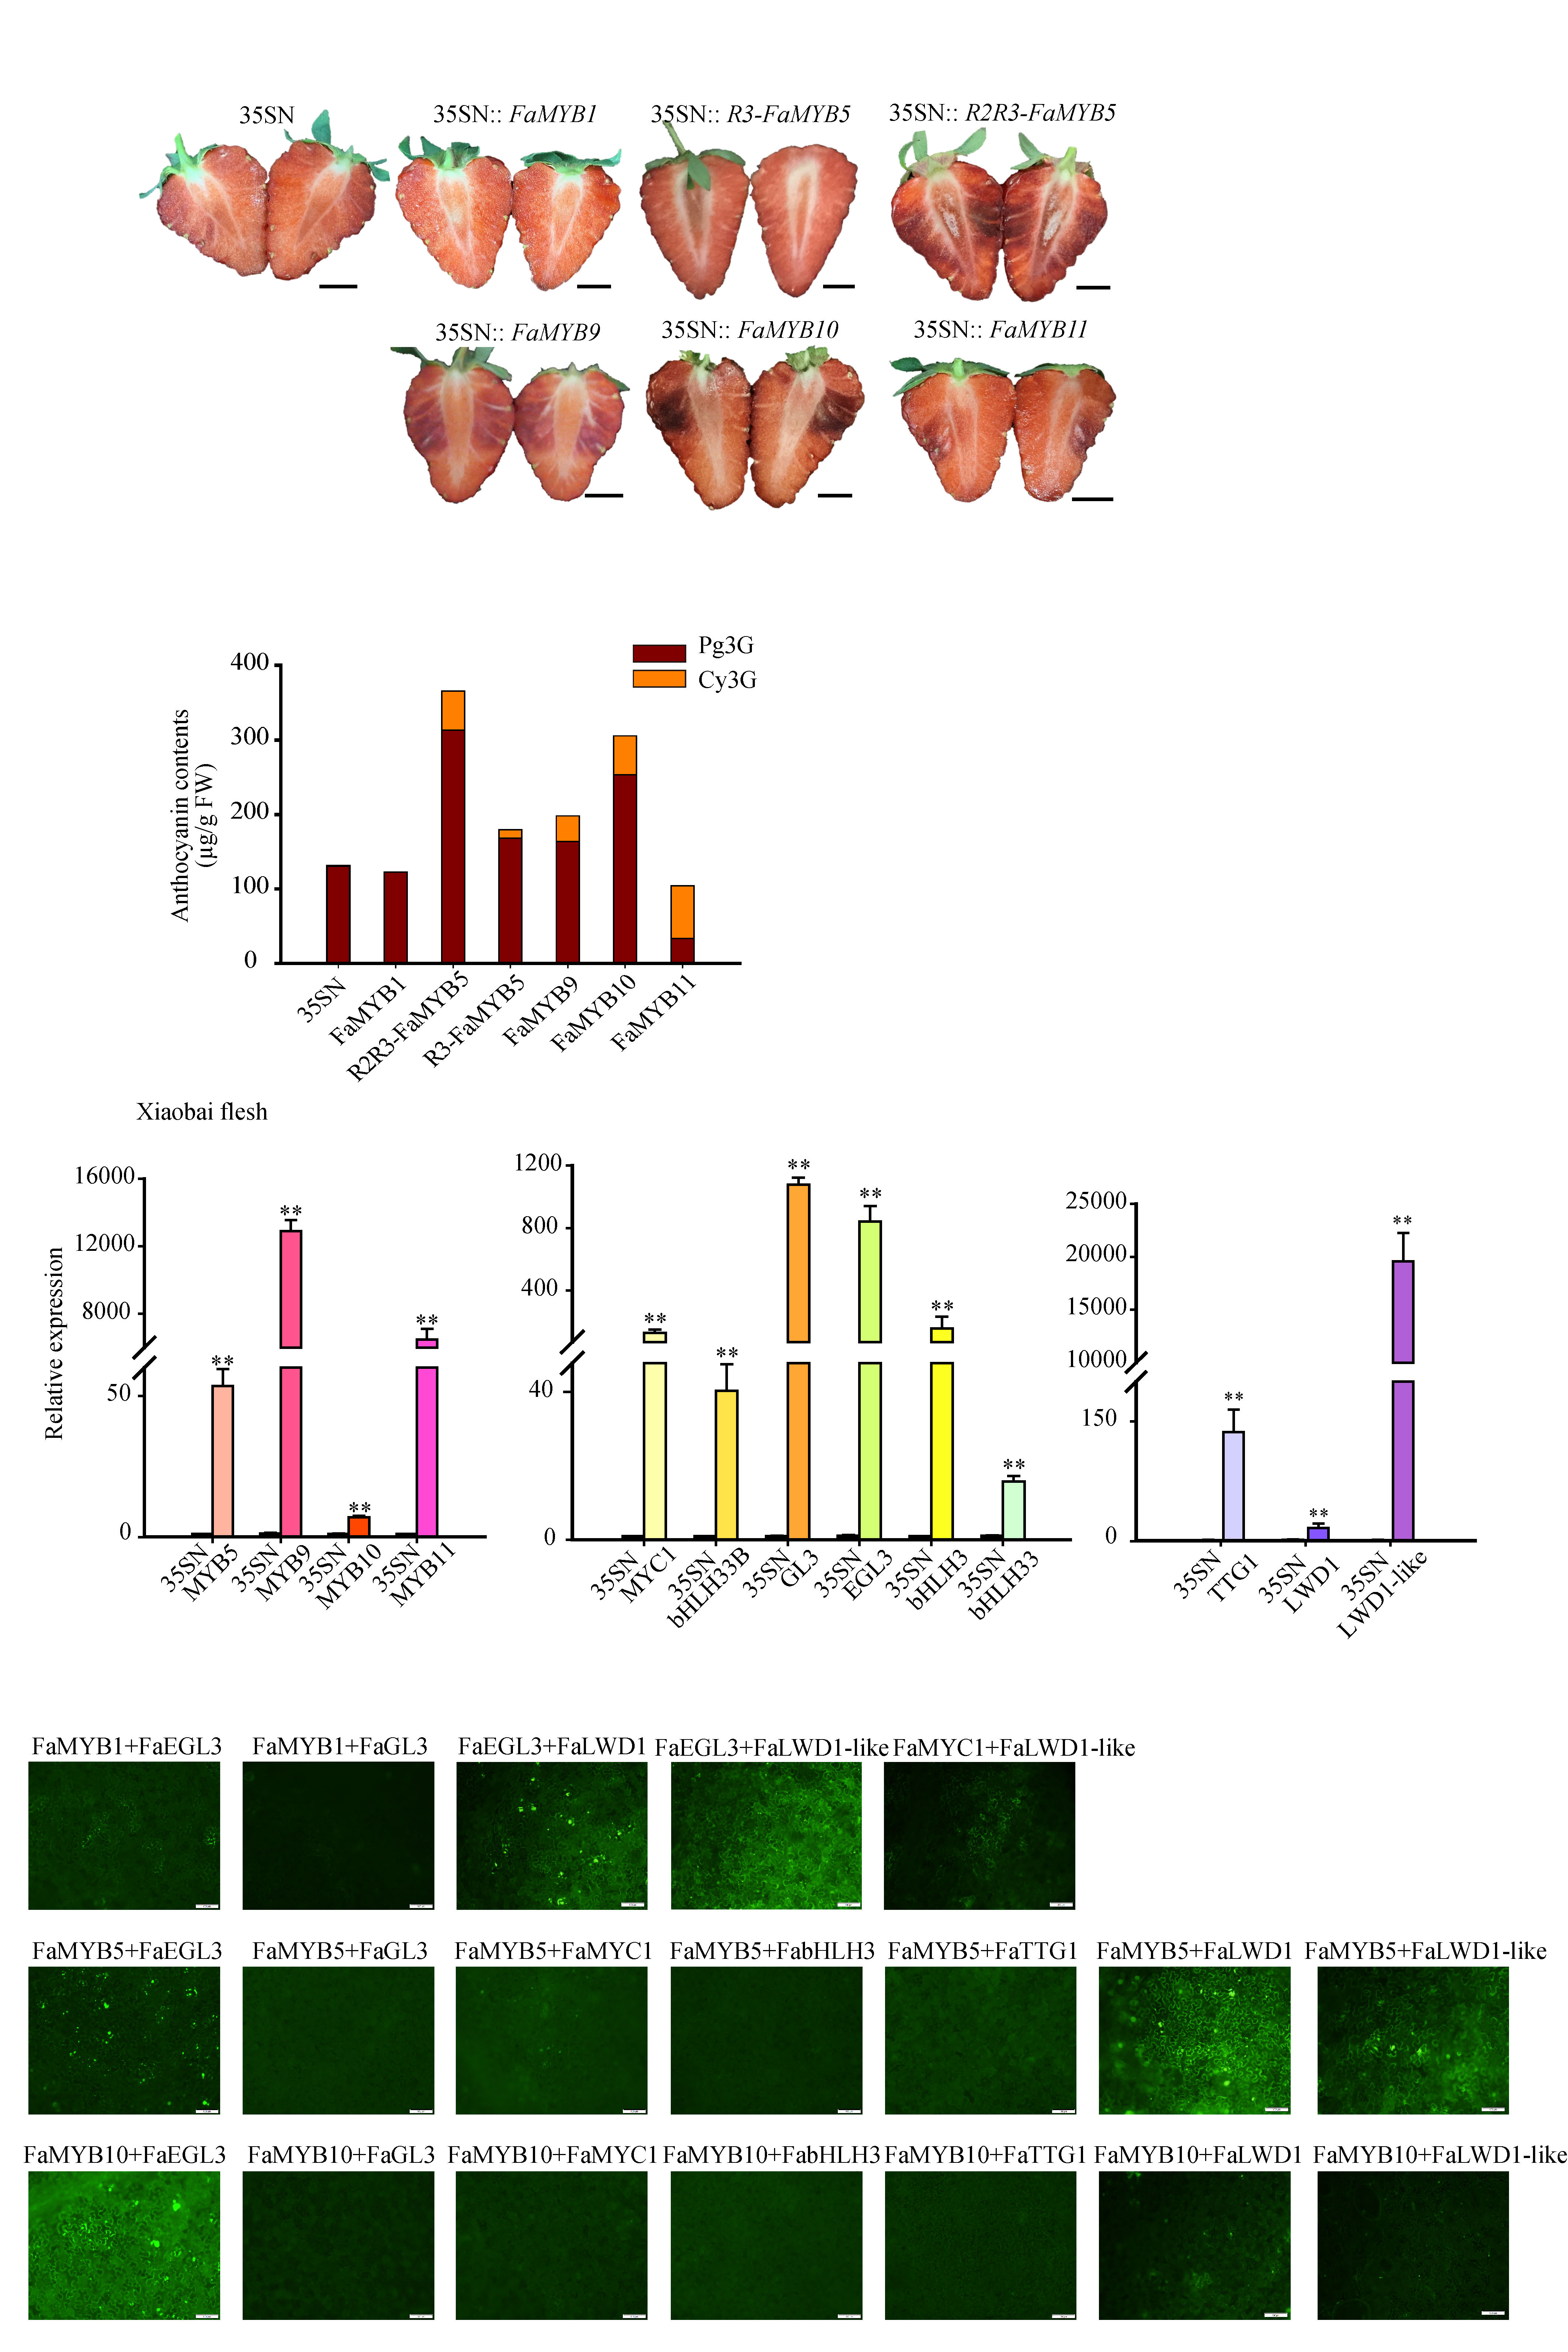


**Figure S3** Relative expression levels of genes in their own overexpressed samples.


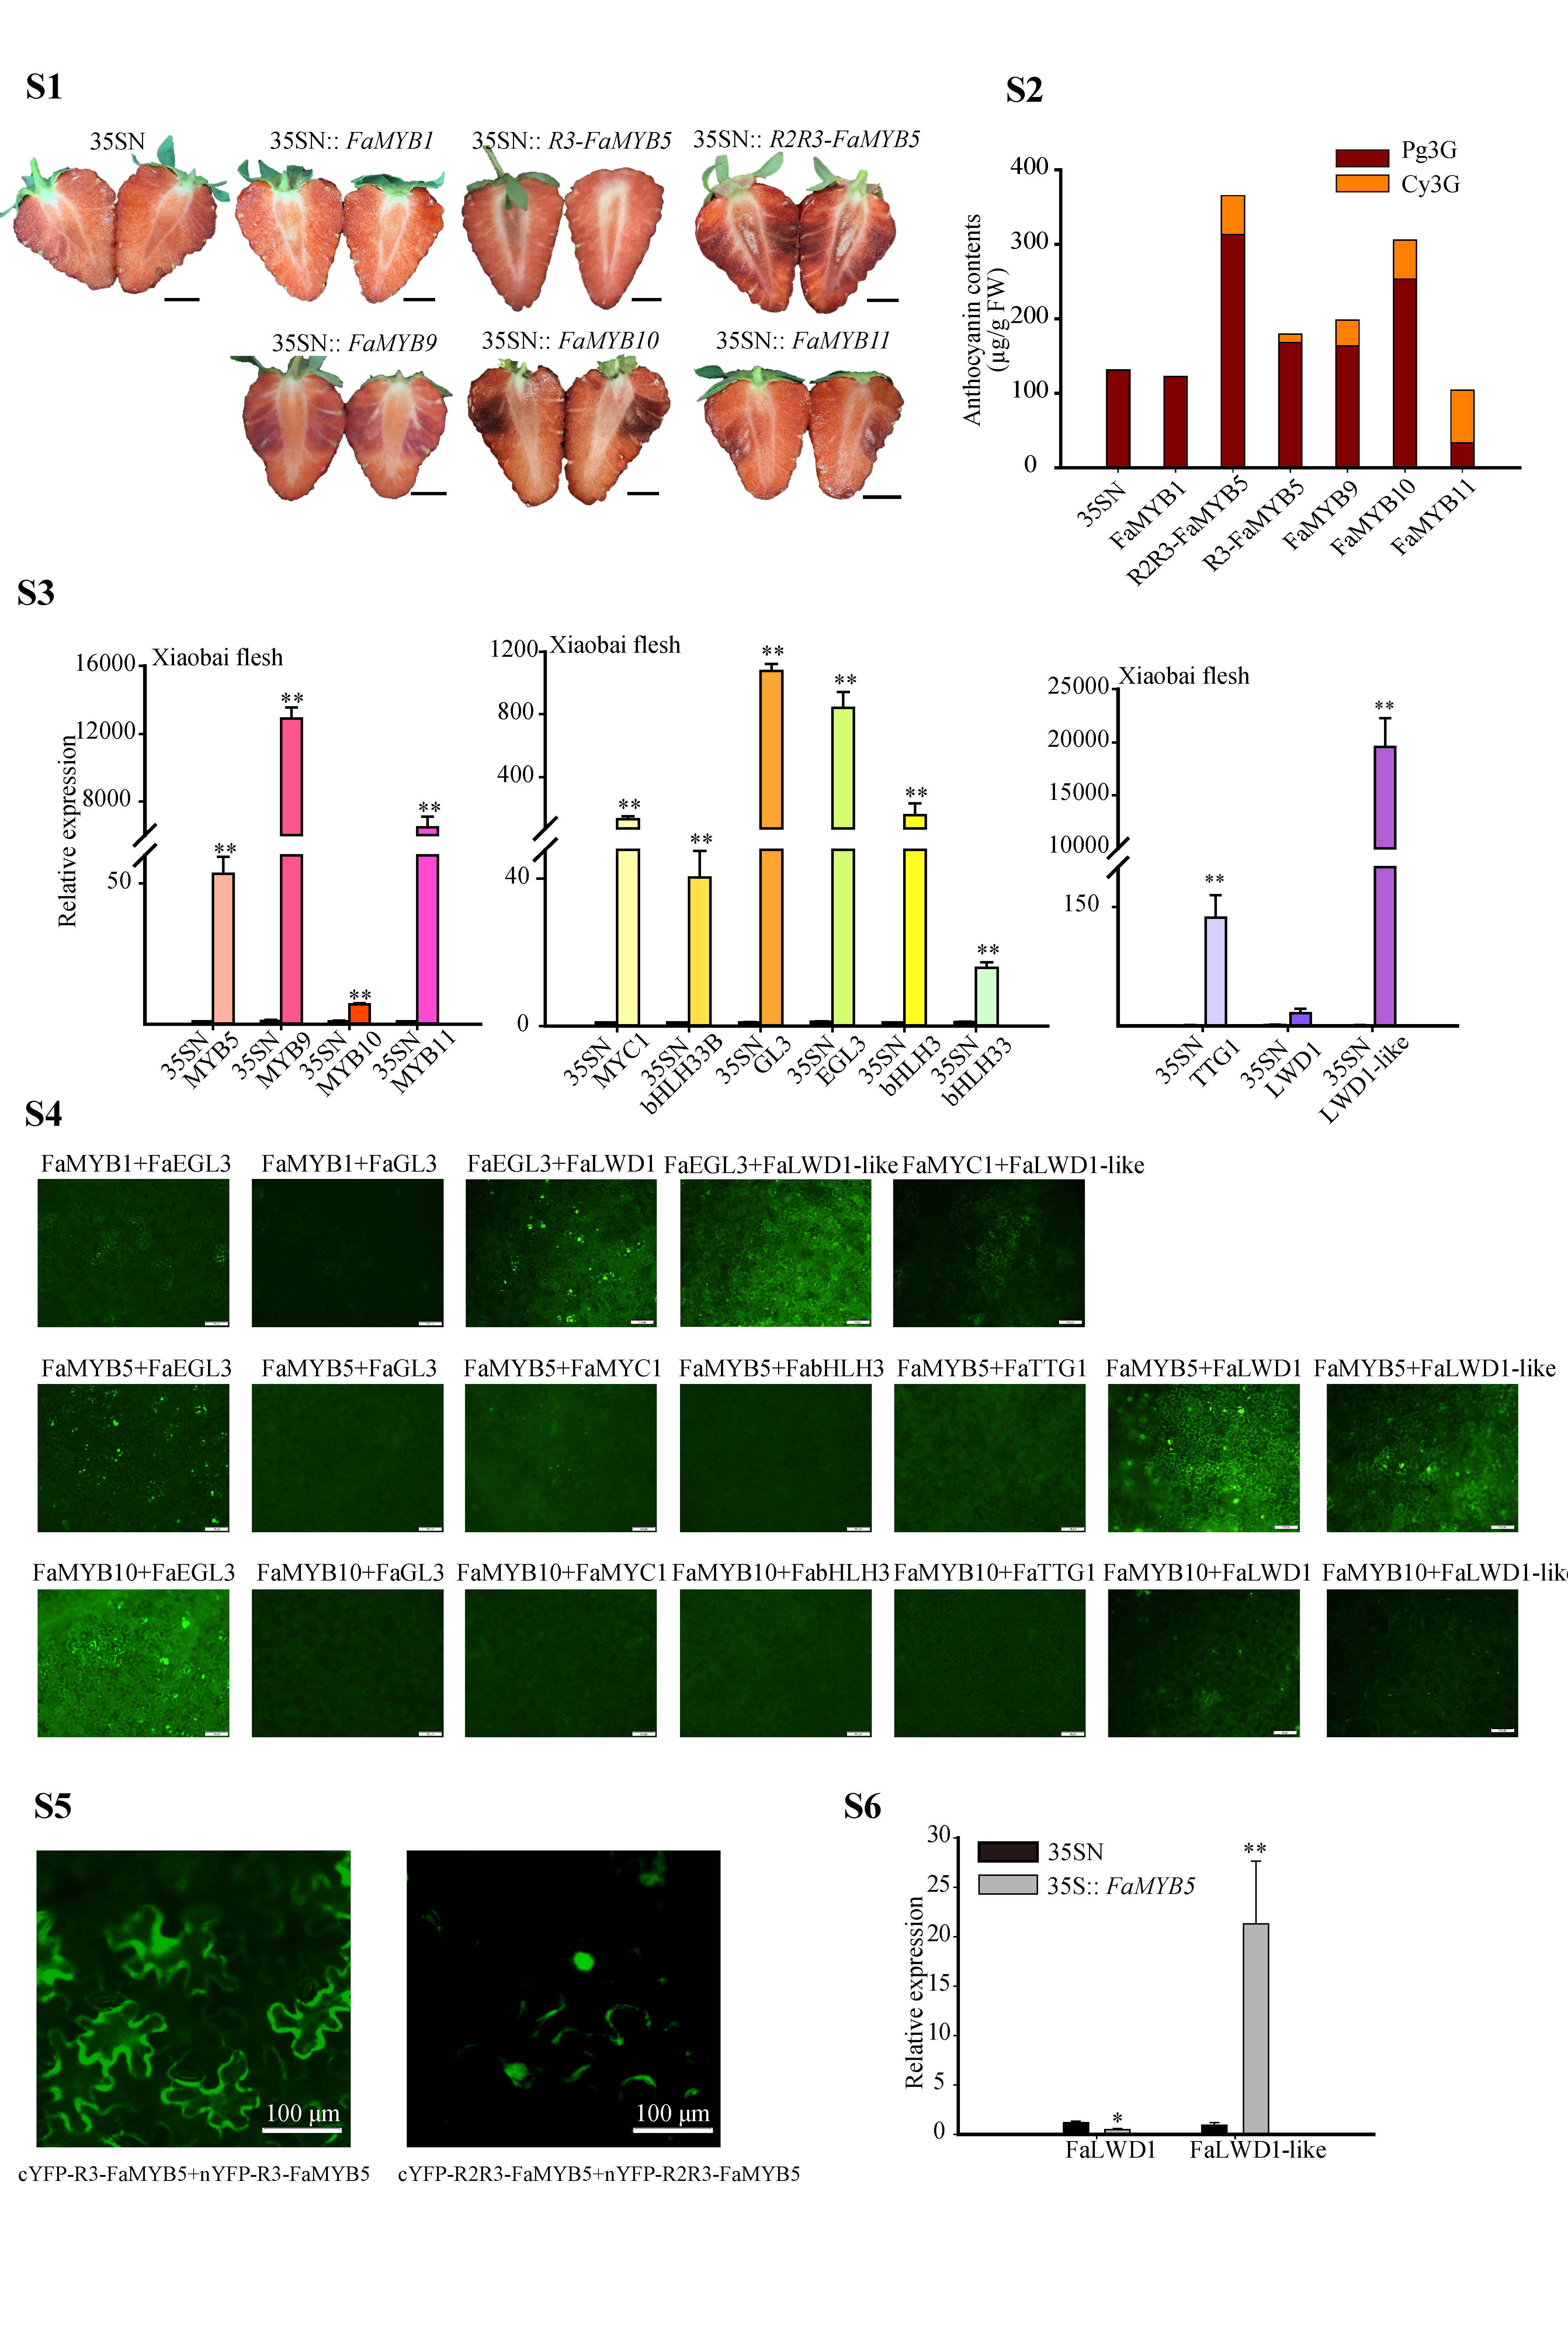


**Figure S4** R3-FaMYB5 and R2R3-FaMYB5 dimerized in different cell regions.


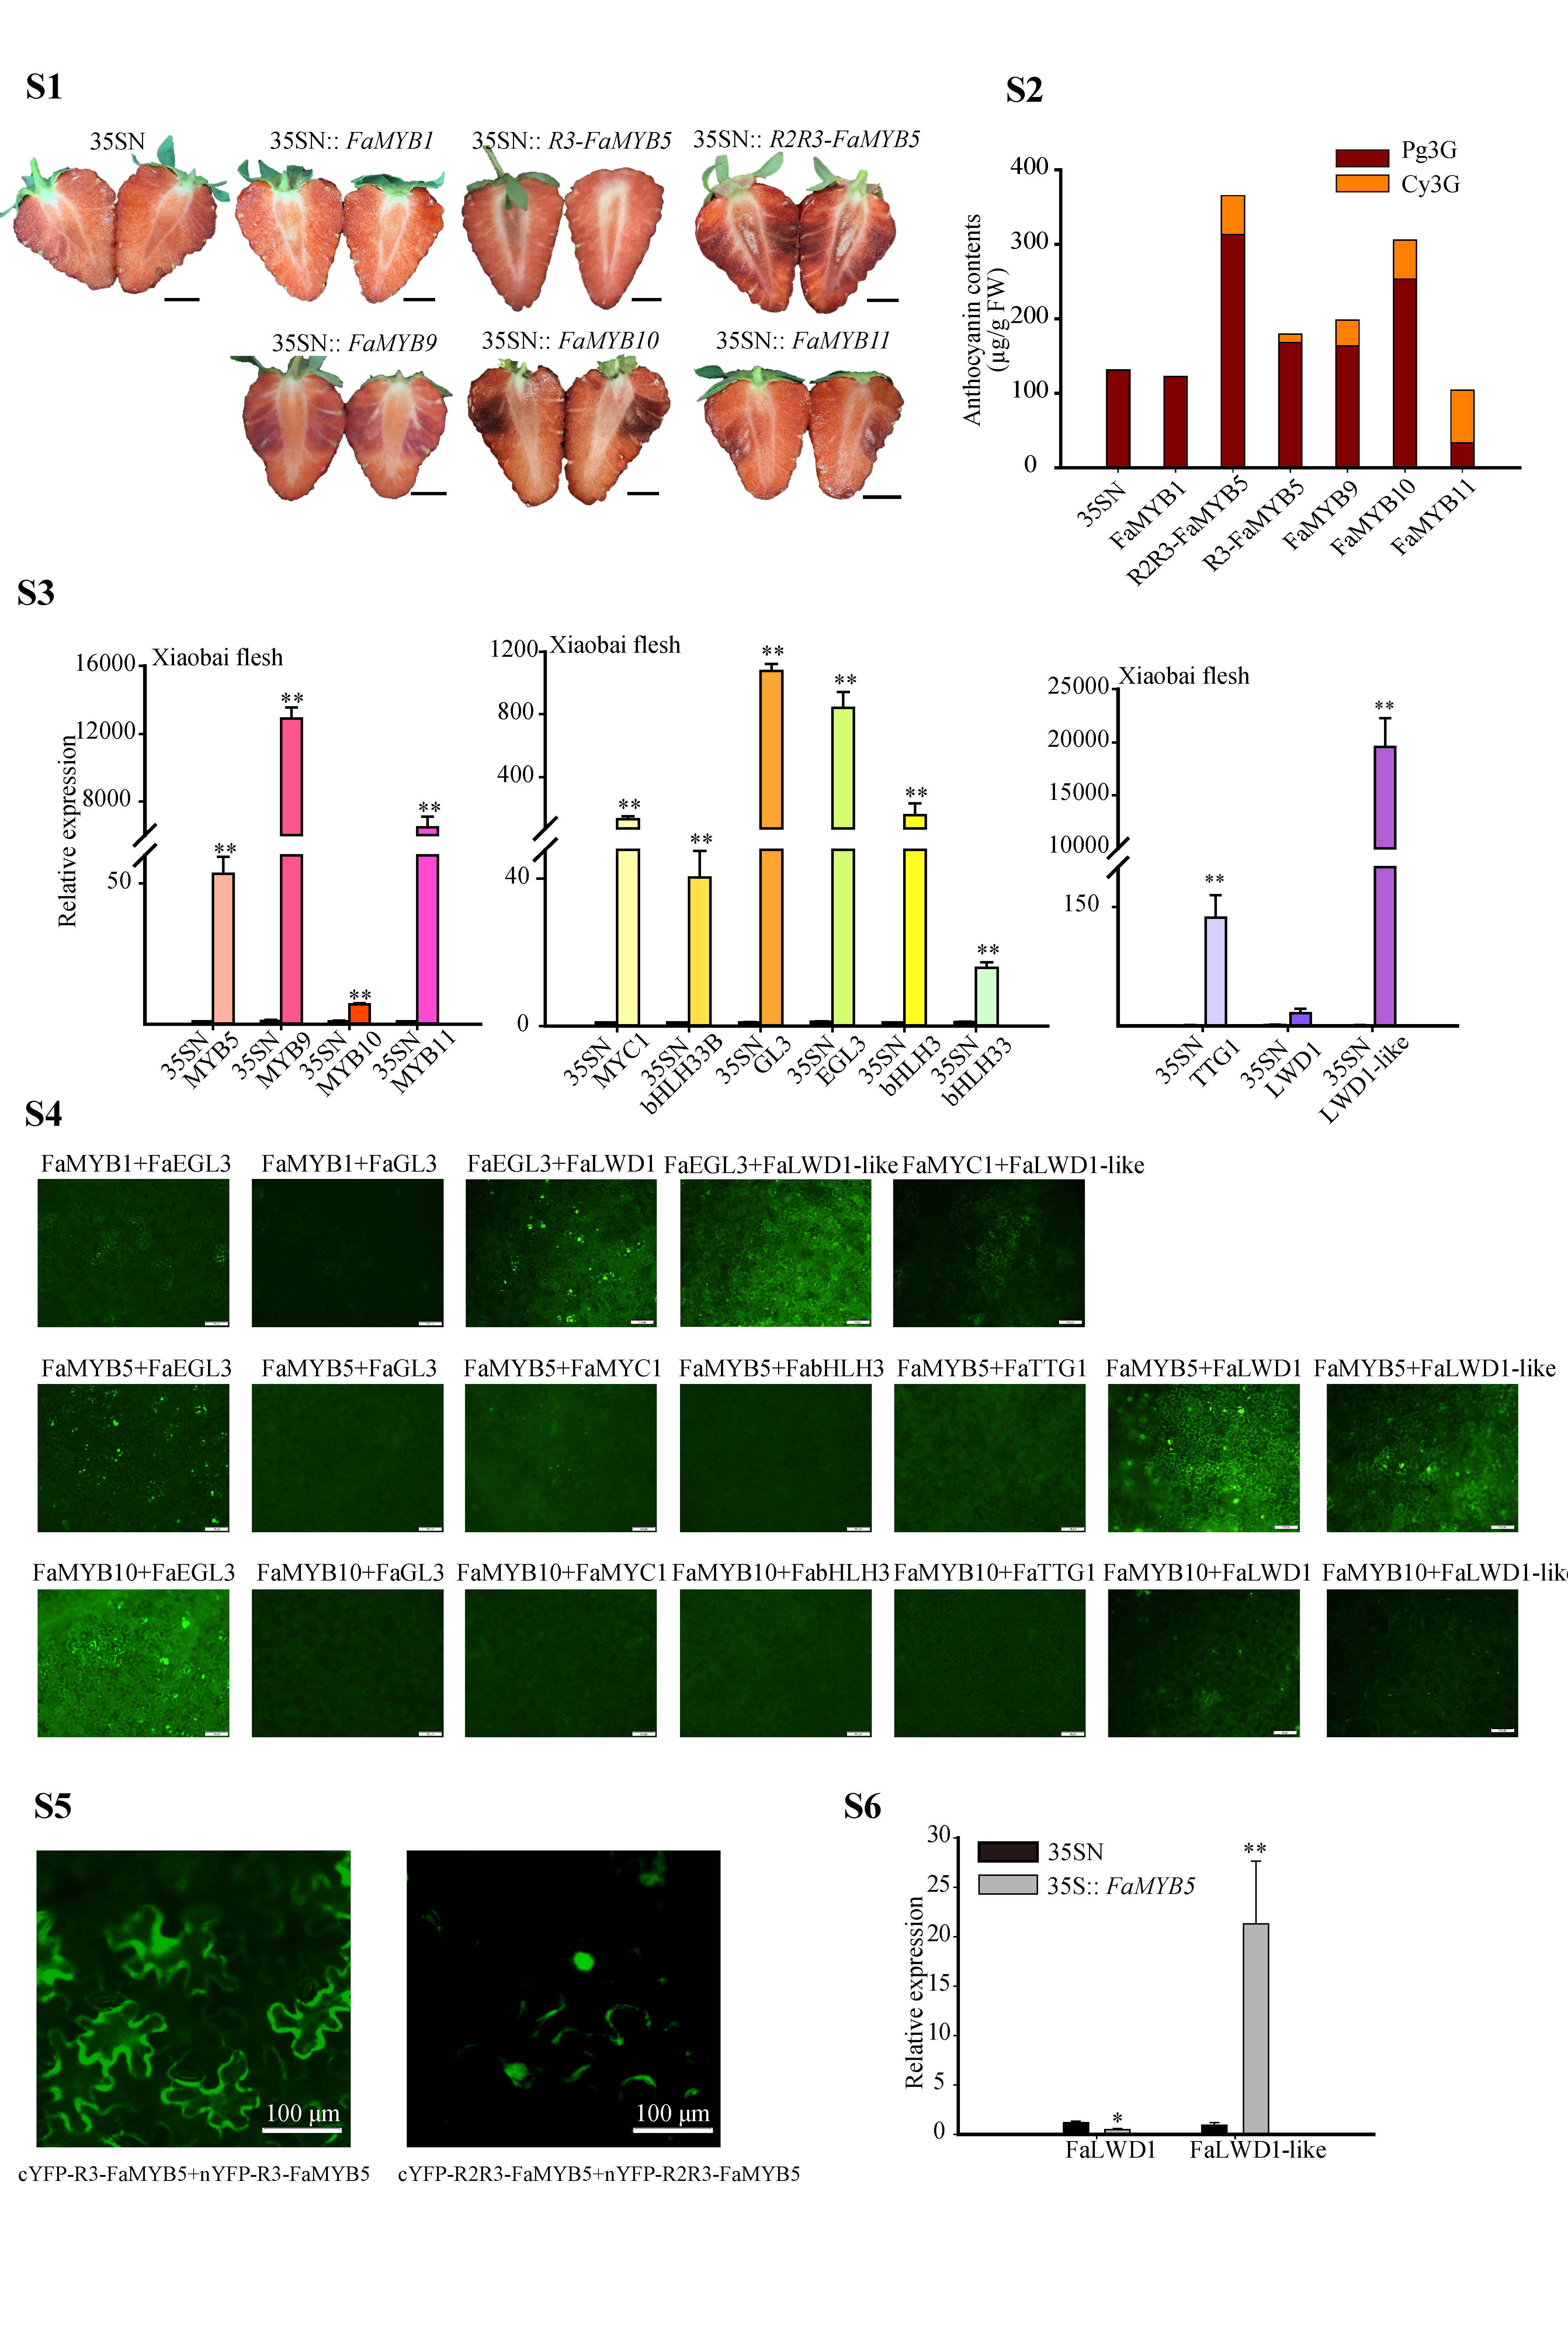


**Figure S5** Relative expression levels of *FaLWD1* and *FaLWD1-like* in *FaMYB5* OE.


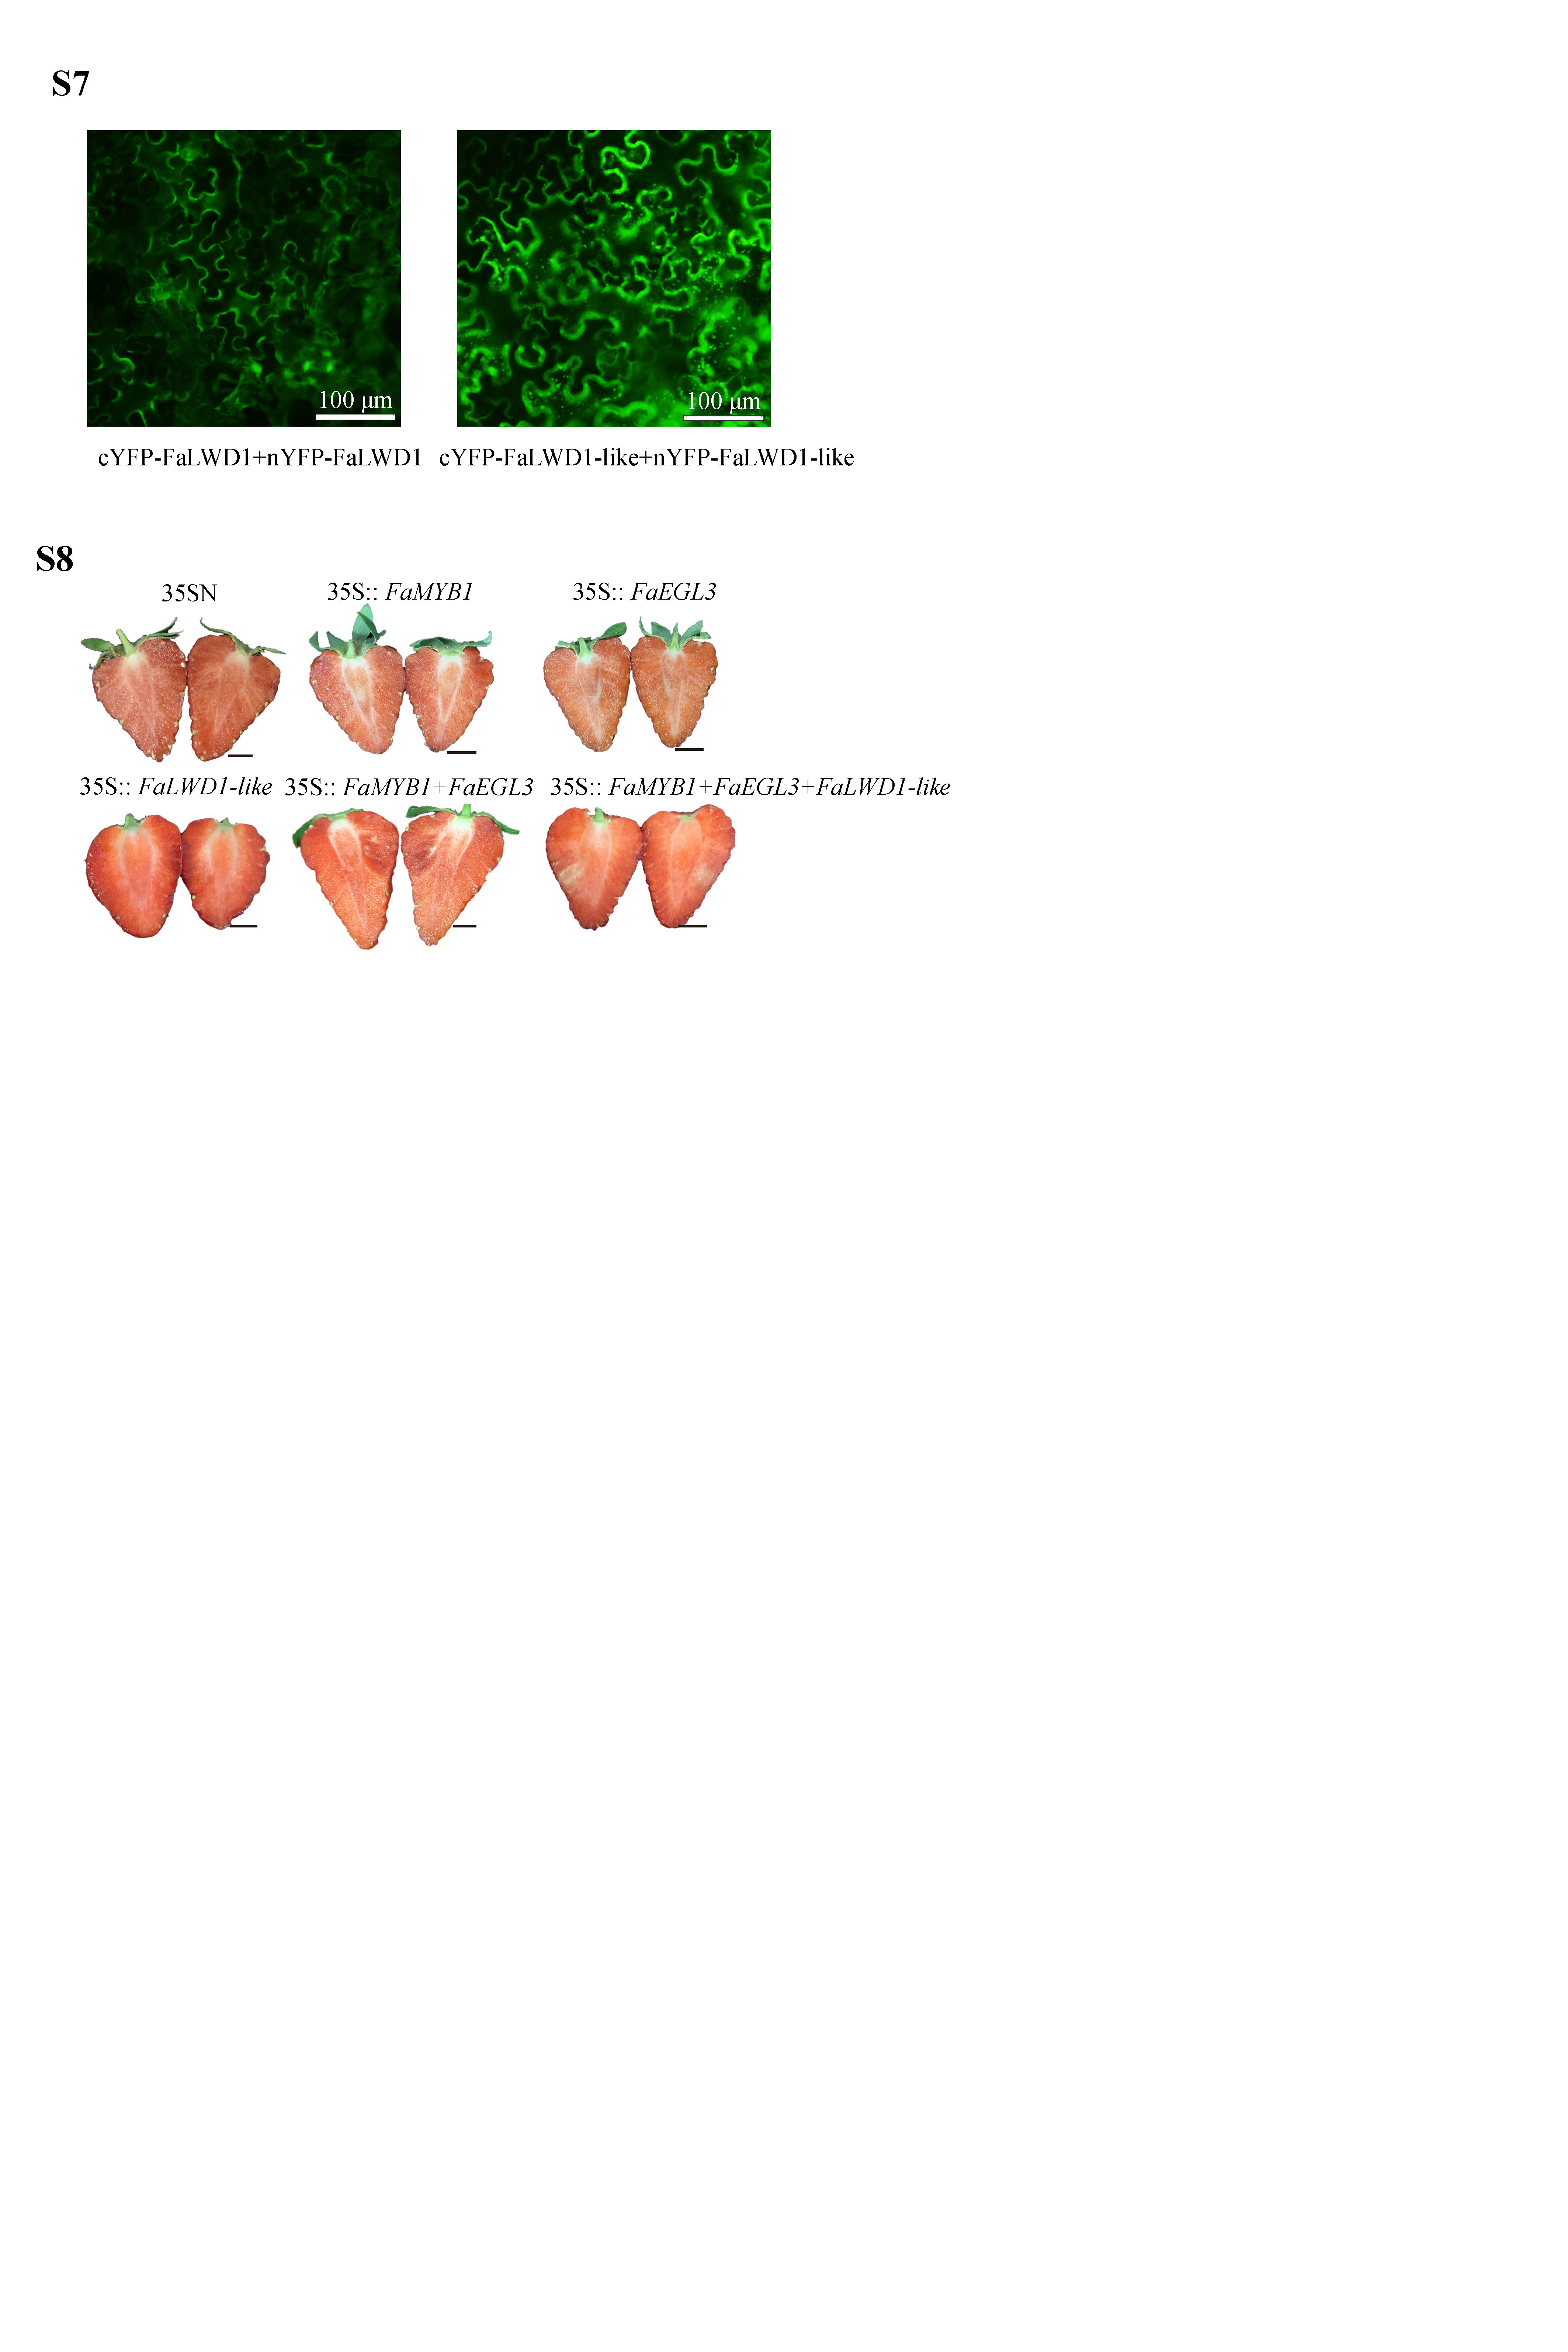


**Figure S6** FaLWD1 and FaLWD1-like dimerized in different cell regions.


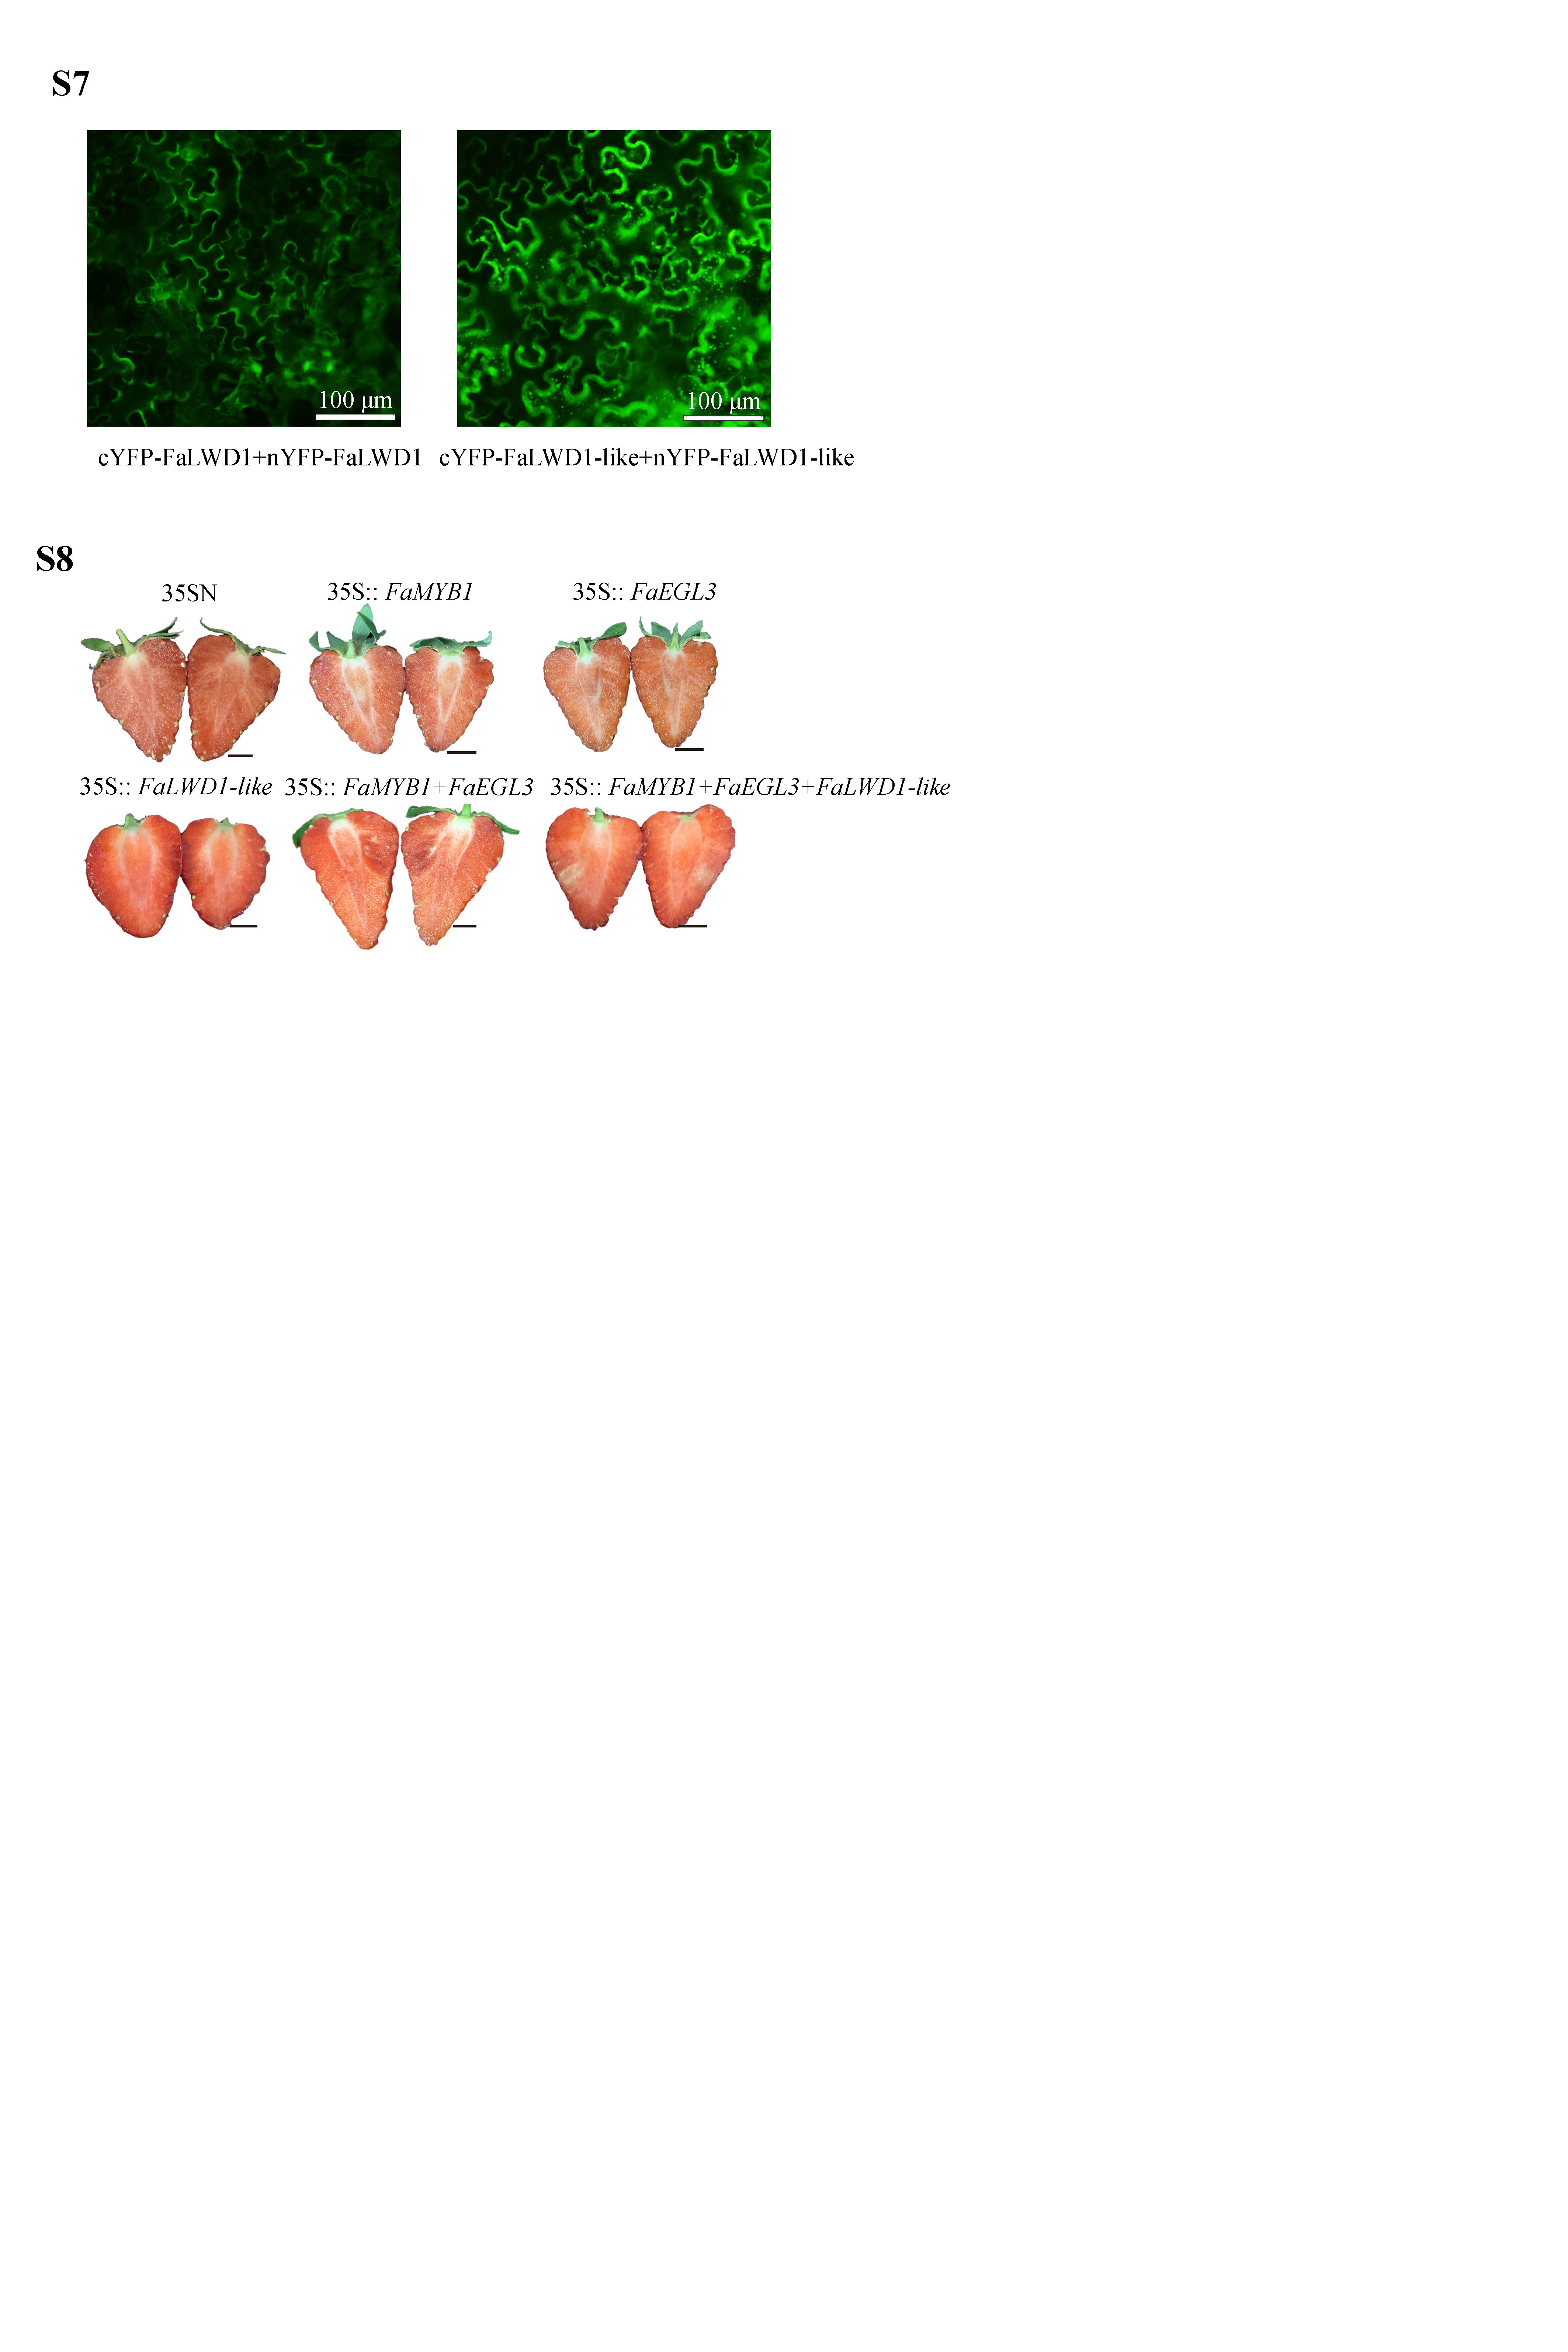


**Figure S7** The phenotype of transient overexpression *FaMYB1*, *FaEGL3* and *FaLWD1-like* in ‘Benihoppe’ fruits.
