# Supplementary material for: Regulation of flavonoids in strawberry fruits by FaMYB5/FaMYB10 dominated MYB-bHLH-WD40 ternary complexes
Source: Front Plant Sci. 2023 Mar 13;14:1145670. doi: 10.3389/fpls.2023.1145670 (PMC10040760; doi:10.3389/fpls.2023.1145670)
Supplement: Supplementary file 2 [file Table_1.xlsx]

## Sheet: CDs
Primers use for CDs amplification
Genes	Primer name	Sequences 5′→ 3′
FaMYB1	pF	ATGAGGAAGCCCTGCTGC
	pR	TTAAGCAACTTGAGGATCAGCC
R3-FaMYB5	pF	ATGAACTACCTCCGTCCT
	pR	TTGATAATGCAGCTTTGTTCG
R2R3FaMYB5	pF	ATGAGGAACCCATCTTCGTC
	pR	TTGATAATGCAGCTTTGTTCG
FaMYB9	pF	ATGGGGAGGAGTCCATGTTGC
	pR	CATGTGTGAGATTATGATGTACCTCT
FaMYB10	pF	ATGGGGGGTTTCGGTGTGAG
	pR	TCACACGTAGGAGATGTTGACTAGAT
FaMYB11	pF	ATGGGGAGGAGTCCTTGTTGTG
	pR	TCATGAAAGCCAGTCCACCTCA
FabHLH3	pF	TTTCCGGAAATGGCGACAC
	pR	CACTAATTATCGTTAAGAGTCAGACTGG
FabHLH33	pF	TCGAGCTCGATGCGGATAATTG
	pR	GGGCTAAAACCTACAAGTACAAG
FabHLH33B	pF	ATGGATGATGATTTCAGCAATGG
	pR	GGGCTAAAACCTACAAGTACAAG
FaEGL3	pF	GATTTGAGTCCCATTGGCCAT
	pR	GGGCTAAAACCTACAAGTACAAG
FaGL3	pF	ATGGGTACTAGGCTCCAGAAC
	pR	GCAGCAGGAAAAAAGACCCT
FaMYC1	pF	ATGGTTGCTTCTCAAGTGC
	pR	GCAGCAGGAAAAAAGACCCT
FaLWD1	pF	ATGGGGGCCAGTAGAAGTAG
	pR	ACTGAGCTGGTAGTCATTCATAC
FaLWD1-like	pF	ATGCAAAGTCCAGCAGAGA
	pR	CTAAACCTTCAATAGCTGCAAC
FaTTG1	pF	ATGGAGAATTCGACCCT
	pR	TCAAACCTTCAAGAGCTGCAT
FaMYB44-like	pF	ATGGCTATGAATCGGAAGG
	pR	TCACTCAATTCTGCTGAT

## Sheet: yeast-two hybrid
Primers use for yeast-two hybrid
	Primer name	Sequences 5′→ 3′
AD
FaMYB1	ADF	CCATGGAGGCCAGTGAATTCATGAGGAAGCCCTGCTGC
	ADR	AGCTCGAGCTCGATGGATCCTTAAGCAACTTGAGGATCAGCC
R3-FaMYB5	ADF	CCATGGAGGCCAGTGAATTCATGAACTACCTCCGTCCT
	ADR	AGCTCGAGCTCGATGGATCCTTGATAATGCAGCTTTGTTCG
R2R3FaMYB5	ADF	CCATGGAGGCCAGTGAATTCATGAGGAACCCATCTTCGTC
	ADR	AGCTCGAGCTCGATGGATCCTTGATAATGCAGCTTTGTTCG
FaMYB9	ADF	CCATGGAGGCCAGTGAATTCATGGGGAGGAGTCCATGTTGC
	ADR	AGCTCGAGCTCGATGGATCCCATGTGTGAGATTATGATGTACCTCT
FaMYB10	ADF	CCATGGAGGCCAGTGAATTCATGGGGGGTTTCGGTGTGAG
	ADR	AGCTCGAGCTCGATGGATCCTCACACGTAGGAGATGTTGACTAGAT
FaMYB11	ADF	CCATGGAGGCCAGTGAATTCATGGGGAGGAGTCCTTGTTGTG
	ADR	AGCTCGAGCTCGATGGATCCTCATGAAAGCCAGTCCACCTCA
FabHLH3	ADF	CCATGGAGGCCAGTGAATTCtTTCCGGAAATGGCGACAC
	ADR	AGCTCGAGCTCGATGGATCCCACTAATTATCGTTAAGAGTCAGACTGG
FabHLH33	ADF	CCATGGAGGCCAGTGAATTCtCGAGCTCGATGCGGATAATTG
	ADR	AGCTCGAGCTCGATGGATCCGGGCTAAAACCTACAAGTACAAG
FabHLH33B	ADF	CCATGGAGGCCAGTGAATTCATGGATGATGATTTCAGCAATGG
	ADR	AGCTCGAGCTCGATGGATCCGGGCTAAAACCTACAAGTACAAG
FaEGL3	ADF	CCATGGAGGCCAGTGAATTCATGGCCAATGGGACTCAAATC
	ADR	AGCTCGAGCTCGATGGATCCGGGCTAAAACCTACAAGTACAAG
FaGL3	ADF	CCATGGAGGCCAGTGAATTCATGGGTACTAGGCTCCAGAAC
	ADR	AGCTCGAGCTCGATGGATCCGCAGCAGGAAAAAAGACCCT
FaMYC1	ADF	CCATGGAGGCCAGTGAATTCATGGTTGCTTCTCAAGTGC
	ADR	AGCTCGAGCTCGATGGATCCGCAGCAGGAAAAAAGACCCT
FaLWD1	ADF	ATGGGGGCCAGTAGAAGTAG
	ADR	ACTGAGCTGGTAGTCATTCATAC
FaLWD1-like	ADF	ATGCAAAGTCCAGCAGAGA
	ADR	CTAAACCTTCAATAGCTGCAAC
FaTTG1	ADF	ATGGAGAATTCGACCCT
	ADR	TCAAACCTTCAAGAGCTGCAT
BD
FabHLH3	BDF	TGGCCATGGAGGCCGAATTCtTTCCGGAAATGGCGACAC
	BDR	TAGTTATGCGGCCGCTGCAGCACTAATTATCGTTAAGAGTCAGACTGG
FabHLH33	BDF	TGGCCATGGAGGCCGAATTCtcGAGCTCGATGCGGATAATTG
	BDR	TAGTTATGCGGCCGCTGCAGGGGCTAAAACCTACAAGTACAAG
FabHLH33B	BDF	TGGCCATGGAGGCCGAATTCATGGATGATGATTTCAGCAATGG
	BDR	TAGTTATGCGGCCGCTGCAGGGGCTAAAACCTACAAGTACAAG
FaEGL3	BDF	TGGCCATGGAGGCCGAATTCATGGCCAATGGGACTCAAATC
	BDR	TAGTTATGCGGCCGCTGCAGGGGCTAAAACCTACAAGTACAAG
FaGL3	BDF	TGGCCATGGAGGCCGAATTCATGGGTACTAGGCTCCAGAAC
	BDR	TAGTTATGCGGCCGCTGCAGGCAGCAGGAAAAAAGACCCT
FaMYC1	BDF	TGGCCATGGAGGCCGAATTCATGGTTGCTTCTCAAGTGC
	BDR	TAGTTATGCGGCCGCTGCAGGCAGCAGGAAAAAAGACCCT
FaLWD1	BDF	TGGCCATGGAGGCCGAATTCATGGGGGCCAGTAGAAGTAG
	BDR	TAGTTATGCGGCCGCTGCAGACTGAGCTGGTAGTCATTCATAC
FaLWD1-like	BDF	TGGCCATGGAGGCCGAATTCATGCAAAGTCCAGCAGAGA
	BDR	TAGTTATGCGGCCGCTGCAGCTAAACCTTCAATAGCTGCAAC
FaTTG1	BDF	TGGCCATGGAGGCCGAATTCCCGATGGAGAATTCGACCCT
	BDR	TAGTTATGCGGCCGCTGCAGTCAAACCTTCAAGAGCTGCAT

## Sheet: BiFC
Primers use for BiFC
	Primer name	Sequences 5′→ 3′
FaMYB1	BiF	CTCGAGCTCAAGCTTCGAATATGAGGAAGCCCTGCTGC
	BiR	ACTCTAGATCAGGTGGATCCTTAAGCAACTTGAGGATCAGCC
R3-FaMYB5	BiF	CTCGAGCTCAAGCTTCGAATATGAACTACCTCCGTCCT
	BiR	ACTCTAGATCAGGTGGATCCTTGATAATGCAGCTTTGTTCG
R2R3FaMYB5	BiF	CTCGAGCTCAAGCTTCGAATATGAGGAACCCATCTTCGTC
	BiR	ACTCTAGATCAGGTGGATCCTTGATAATGCAGCTTTGTTCG
FaMYB10	BiF	CTCGAGCTCAAGCTTCGAATATGGGGGGTTTCGGTGTGAG
	BiR	ACTCTAGATCAGGTGGATCCTCACACGTAGGAGATGTTGACTAGAT
FabHLH3	BiF	CTCGAGCTCAAGCTTCGAATTTTCCGGAAATGGCGACAC
	BiR	ACTCTAGATCAGGTGGATCCCACTAATTATCGTTAAGAGTCAGACTGG
FabHLH33	BiF	CTCGAGCTCAAGCTTCGAATTCGAGCTCGATGCGGATAATTG
	BiR	ACTCTAGATCAGGTGGATCCGGGCTAAAACCTACAAGTACAAG
FabHLH33B	BiF	CTCGAGCTCAAGCTTCGAATATGGATGATGATTTCAGCAATGG
	BiR	ACTCTAGATCAGGTGGATCCGGGCTAAAACCTACAAGTACAAG
FaEGL3	BiF	CTCGAGCTCAAGCTTCGAATATGGCCAATGGGACTCAAATC
	BiR	ACTCTAGATCAGGTGGATCCGGGCTAAAACCTACAAGTACAAG
FaGL3	BiF	CTCGAGCTCAAGCTTCGAATATGGGTACTAGGCTCCAGAAC
	BiR	ACTCTAGATCAGGTGGATCCGCAGCAGGAAAAAAGACCCT
FaMYC1	BiF	CTCGAGCTCAAGCTTCGAATATGGTTGCTTCTCAAGTGC
	BiR	ACTCTAGATCAGGTGGATCCGCAGCAGGAAAAAAGACCCT
FaLWD1	BiF	CTCGAGCTCAAGCTTCGAATATGGGGGCCAGTAGAAGTAG
	BiR	ACTCTAGATCAGGTGGATCCACTGAGCTGGTAGTCATTCATAC
FaLWD1-like	BiF	CTCGAGCTCAAGCTTCGAATATGCAAAGTCCAGCAGAGA
	BiR	ACTCTAGATCAGGTGGATCCCTAAACCTTCAATAGCTGCAAC
FaTTG1	BiF	CTCGAGCTCAAGCTTCGAATCCGATGGAGAATTCGACCCT
	BiR	ACTCTAGATCAGGTGGATCCTCAAACCTTCAAGAGCTGCAT

## Sheet: overexpression
Primers use for overexpression
Gene	Primer	Sequences 5′→ 3′
FaMYB1	OF	TCGAGGGGGGGCCCGGTACCATGAGGAAGCCCTGCTGC
	OR	GGGGATCCACTAGTTCTAGATTAAGCAACTTGAGGATCAGCC
R3-FaMYB5	OF	TCGAGGGGGGGCCCGGTACCATGAACTACCTCCGTCCT
	OR	GGGGATCCACTAGTTCTAGATTGATAATGCAGCTTTGTTCG
R2R3FaMYB5	OF	TCGAGGGGGGGCCCGGTACCATGAGGAACCCATCTTCGTC
	OR	GGGGATCCACTAGTTCTAGATTGATAATGCAGCTTTGTTCG
FaMYB9	OF	TTTACGAACGATAGGGTACCATGGGGAGGAGTCCATGTTGC
	OR	TGATTTTTGCGGACTCTAGACATGTGTGAGATTATGATGTACCTCT
FaMYB10	OF	TCGAGGGGGGGCCCGGTACCATGGGGGGTTTCGGTGTGAG
	OR	GGGGATCCACTAGTTCTAGATCACACGTAGGAGATGTTGACTAGAT
FaMYB11	OF	AAGCTTATCGATACCGTCGACATGGGGAGGAGTCCTTGTTGTG
	OR	GATCTGCAGCCCGGGGGATCCTCATGAAAGCCAGTCCACCTCA
FabHLH3	OF	TCGAGGGGGGGCCCGGTACCTTTCCGGAAATGGCGACAC
	OR	GGGGATCCACTAGTTCTAGACACTAATTATCGTTAAGAGTCAGACTGG
FabHLH33	OF	TCGAGGGGGGGCCCGGTACCTCGAGCTCGATGCGGATAATTG
	OR	GGGGATCCACTAGTTCTAGAGGGCTAAAACCTACAAGTACAAG
FabHLH33B	OF	TCGAGGGGGGGCCCGGTACCATGGATGATGATTTCAGCAATGG
	OR	GGGGATCCACTAGTTCTAGAGGGCTAAAACCTACAAGTACAAG
FaEGL3	OF	TCGAGGGGGGGCCCGGTACCGATTTGAGTCCCATTGGCCAT
	OR	GGGGATCCACTAGTTCTAGAGGGCTAAAACCTACAAGTACAAG
FaGL3	OF	TCGAGGGGGGGCCCGGTACCATGGGTACTAGGCTCCAGAAC
	OR	GGGGATCCACTAGTTCTAGAGCAGCAGGAAAAAAGACCCT
FaMYC1	OF	TCGAGGGGGGGCCCGGTACCATGGTTGCTTCTCAAGTGC
	OR	GGGGATCCACTAGTTCTAGAGCAGCAGGAAAAAAGACCCT
FaLWD1	OF	TCGAGGGGGGGCCCGGTACCATGGGGGCCAGTAGAAGTAG
	OR	GGGGATCCACTAGTTCTAGAACTGAGCTGGTAGTCATTCATAC
FaLWD1-like	OF	TCGAGGGGGGGCCCGGTACCATGCAAAGTCCAGCAGAGA
	OR	GGGGATCCACTAGTTCTAGACTAAACCTTCAATAGCTGCAAC
FaTTG1	OF	TCGAGGGGGGGCCCGGTACCATGGAGAATTCGACCCT
	OR	GGGGATCCACTAGTTCTAGATCAAACCTTCAAGAGCTGCAT
FaMYB44-like	OF	TCGAGGGGGGGCCCGGTACCATGGCTATGAATCGGAAGG
	OR	GGGGATCCACTAGTTCTAGATCACTCAATTCTGCTGAT

## Sheet: q-PCR
Primers use for q-PCR
	Primer name	Sequences 5′→ 3′
26S-18S	qF	ACCGTTGATTCGCACAATTGGTCATCG
	qR	TACTGCGGGTCGGCAATCGGACG
FaMYB5	qF	ATGACTCTGATGCCTCTG
	qR	TGTCTTCATCCTCCTCATT
FaMYB10	qF	CAATGATGTGAAGAACTATT
	qR	TCTGAATGATTATGCTCTAT
FaLWD1	qF	CAGTAGAAGTAGCGATCC
	qR	GCCTCGTATGTGTAGATC
FaLWD1-like	qF	ATTGTTGAGGCTAGAATG
	qR	AATATCACCACCTTGTTG
FaMYB44-like	qF	ACCGCCAGTAGAAACGA
	qR	ACAGCGAAGTTGGAGGA
PAL	qF	CAGAAGCAGTTGACATAC
	qR	CTTCAAGTTCTCCTCCAA
C4H	qF	GTGAAGGAGAAGAGGATT
	qR	CATTAGTTGTGACCTGTG
CHS	qF	CGCATGTGTGACAAATCTAT
	qR	ATCAAGTGAAGGTGCCAT
CHI	qF	GAGTCGGTTGAGTTCTTC
	qR	CAGCGGTAGTATCATTGTC
F3H	qF	GGAGGTTCAAGAATGCTGAT
	qR	TCTGGAATGTCGCTATGGA
DFR2	qF	GATAGCAGTGTCGTCCAT
	qR	CTCTCAACATACAGAAGATAGATT
F3'H	qF	ATGGTGGTGGAGATGATG
	qR	CAAGTCAAGCCACTCAAG
ANS	qF	GCGACACCTTAGAGATTC
	qR	CACCTTCTCCTTGTTGAC
F3GT	qF	AACCATCACTGTCATTGC
	qR	ACTCCAAGTTTCCGAAGA
OMT	qF	AAGATGCTCCTCAATATCC
	qR	CTCCAGTCGTGACATATC
LAR	qF	GTAGCCTCGTTCACTCAT
	qR	TGCCTATATCAACATCATTCG
ANR	qF	TCCATATCCATTACACAT
	qR	CTCAGGAACACTACTATT
TT19	qF	CTGATCTGAGCCATCTTC
	qR	ATTCTTCCTCTCCGTGAT
TT12	qF	CTGATTAGCATAGTGTTC
	qR	CTGAGAGTATAGGTTGAA
AHA10	qF	GTGTTCTTCTACTGGATT
	qR	GCTTGACTTATGATACTAAC
HCT	qF	CTGGTTACTTTGGCAAT
	qR	ATGTTGGTTTTGATTGGAGAT
C3H	qF	TATCAGTGAGGGAGTATT
	qR	CAGTCCTTGTTTGTCTAA
CCoAoMT	qF	GAAGACGAGAAGAACCAT
	qR	TTGTGGTAGTTGATGTAGTT
CCR	qF	CCAACGCTAAATACAAGTG
	qR	GGCAACATCTTTGACATTA
F5H	qF	ACGACCACTTACAGAAGA
	qR	AACGCTAACAAGTCATCCA
CoMT	qF	GAGCTTGCCAACATGA
	qR	GAACCCTTTTGCCAGA
CAD	qF	AGATATTTCGGACTTGAC
	qR	ATCACTGTAACCTTCACT

## Sheet: Dual-luciferase assay
Primers use for Dual-luciferase assay
	Primer name	Sequences 5′→ 3′
proF3'H	LucF	TATAGGGCGAATTGGGTACCGGTGTAAATCTGCATCATACGTC
	LucR	GCTCTAGAACTAGTGGATCCGGTTGTTTGTCTTTGTGTTCAATAT
proLAR	LucF	TATAGGGCGAATTGGGTACCCTTTCATCTCGTGTTAACTGTGG
	LucR	GCTCTAGAACTAGTGGATCCTTGAAACAGAGGTCGTTCCTT
proAHA10	LucF	TATAGGGCGAATTGGGTACCAATGAAGATAGAACAGTCACA
	LucR	GCTCTAGAACTAGTGGATCCATTCAACCTTCAAATCCCTG
proTT12	LucF	TATAGGGCGAATTGGGTACCCTTCCGACTTCATATACACA
	LucR	GCTCTAGAACTAGTGGATCCTAATCTCGTTCTGGCTCTC
